# Supplementary material
Source: PubMed Central journal article supplement (PMC8285256)
Supplement: mmc2.pdf [file mmc2.pdf]

## Journal of Hepatology CTAT methods

Tables for a “Complete, Transparent, Accurate and Timely account” (CTAT) are now mandatory for all revised submissions. The aim is to enhance the reproducibility of methods.

- Only include the parts relevant to your study
- Refer to the CTAT in the main text as ‘Supplementary CTAT Table’
- Do not add subheadings
- Add as many rows as needed to include all information
- Only include one item per row

**If the CTAT form is not relevant to your study, please outline the reasons why:**

### 1.1 Antibodies

| Name                           | Citation | Supplier                  | Cat no.     | Clone no. |
|--------------------------------|----------|---------------------------|-------------|-----------|
| pJak1(Tyr1034/1035)            |          | Cell Signaling Technology | 74129       |           |
| Jak1                           |          | Cell Signaling Technology | 50996       |           |
| pJak2 (Tyr1007/1008)           |          | Cell Signaling Technology | 3776        |           |
| Jak2                           |          | Cell Signaling Technology | 3230        |           |
| pSTAT3 (Tyr705)                |          | Cell Signaling Technology | 9131        |           |
| STAT3                          |          | Cell Signaling Technology | 9139        |           |
| pSTAT1 (Tyr701)                |          | Cell Signaling Technology | 9167        |           |
| STAT1                          |          | Cell Signaling Technology | 9176        |           |
| β-actin                        |          | Sigma-Aldrich             | A2228       |           |
| Factor VIII                    |          | Novus Biologicals         | NB100-91761 |           |
| vWF                            |          | Dako                      | A0082       |           |
| Fibrinogen                     |          | Dako                      | A0080       |           |
| CD61                           |          | Dako                      | M0753       |           |
| CD41                           |          | Bio Rad                   | MCA2245     |           |
| Integrin alpha IIb             |          | Santa Cruz Biotechnology  | sc365938    |           |
| IRDye Donkey anti-Rabbit 680RD |          | LI-COR                    | 925-68073   |           |
| IRDye Donkey anti-Mouset 800CW |          | LI-COR                    | 926-32212   |           |
| Donkey anti-rabbit Alexa 647   |          | Invitrogen                | A31573      |           |
| Donkey anti-rat Alexa 488      |          | Invitrogen                | A21208      |           |
| Alexa Fluor 488 phalloidin     |          | moleculer probee          | A1239       |           |

### 1.2 Cell lines

| Name | Citation | Supplier | Cat no. | Passage no. | Authentication test method |
|------|----------|----------|---------|-------------|----------------------------|
| N/A  |          |          |         |             |                            |

## 1.3 Organisms

| Name | Citation | Supplier | Strain | Sex | Age | Overall n number |
|------|----------|----------|--------|-----|-----|------------------|
| N/A  |          |          |        |     |     |                  |

## 1.4 Sequence based reagents

| Human Gene Name     | Primer Sequences (5'-3')                                   | Supplier |
|---------------------|------------------------------------------------------------|----------|
| Factor VIII         | F: GTGCCTTTTGCATTCTGCT<br>R: GCAGCTCACCGAGATCACTT          | Yale     |
| vWF                 | F: CCATCGAGGTGAAGCACAGT<br>R: CCATGTTCCACCCACGTAA          | Yale     |
| IL-6                | F: ACCCCCAGGAGAAGATTCCA<br>R: GATGCCGTCGAGGATGTACC         | Yale     |
| CXCL1               | F: GCGCCCAAACCGAAGTCATA<br>R: ATGGGGGATGCAGGATTGAG         | Yale     |
| CXCL2               | F: GGCAGAAAGCTTGTCTCAACCC<br>R: CTCCTTCAGGAACAGCCACCAA     | Yale     |
| ICAM1               | F: AGGATGGCACTTTCCCACTG<br>R: GGAGAGCACATTACGGTCA          | Yale     |
| VCAM1               | F: GTCTCATTGACTTGCAGCACC<br>R: AGATGTGGTCCCCTCATTCTG       | Yale     |
| P-selectin          | F: ATTGTACTIONCGATCGGGACGC<br>R: AGAGAAATGGCAGGTGGAGC      | Yale     |
| E-selectin          | F: AAGGCTTCATGTTGCAGGGA<br>R: ATTCATGTAGCCTCGCTCGG         | Yale     |
| 18S                 | F: GGCCCTGTAATTGGAATGAGTC<br>R: CCAAGATCCAACACTACGAGCTT    | Yale     |
| Mouse Gene name     | Primer Sequences (5'-3')                                   | Supplier |
| IL-6                | F: ACAAGTCGGAGGCTTAATTACACAT<br>R: TTGCCATTGCACAACCTCTTTTC | Yale     |
| Fibrinogen $\alpha$ | F: GCCCAACGAGAGACTGTGAT<br>R: CCATCCTCCCAAACCTGGTCTC       | Yale     |
| 18S                 | F: ACGGAAGGGCACCACCAGGA<br>R: CACCACCACCCACGGAATCG         | Yale     |

## 1.5 Biological samples

| Description | Source | Identifier |
|-------------|--------|------------|
| N/A         |        |            |

## 1.6 Deposited data

| Name of repository | Identifier | Link |
|--------------------|------------|------|
| N/A                |            |      |

## 1.7 Software

| Software name | Manufacturer  | Version |
|---------------|---------------|---------|
| Image J       | NIH           | 1.53C   |
| Prism         | Prism         | 7.0a    |
| JMP           | SAS Institute | 15      |
| FlowJo        | FlowJo LLC    | 10.7.1  |

|  |  |  |
|--|--|--|
|  |  |  |
|--|--|--|

## 1.8 Other (e.g. drugs, proteins, vectors etc.)

|                                   |                 |                    |
|-----------------------------------|-----------------|--------------------|
| STAT1 siRNA                       | M-003543-01-005 | Dharmacon          |
| STAT3 siRNA                       | M-003544-02-005 | Dharmacon          |
| Recombinant human IL6             | 206-IL          | R&D systems        |
| Recombinant soluble IL6R $\alpha$ | 227-SR          | R&D systems        |
| Recombinant soluble gp130         | 228-GP          | R&D systems        |
| Ruxolitinib (phosphate)           | 23215           | Cayman CHEMICAL    |
| Filgotinib                        | 17669           | Cayman CHEMICAL    |
| DAPI                              | F6057           | Sigma-Aldrich      |
| ScreenFect <sup>TM</sup> A        | 299-73203       | Wako Chemicals USA |

## 1.9 Please provide the details of the corresponding methods author for the manuscript:

Prepared by Nao Kawaguchi ([nao.kawaguchi@yale.edu](mailto:nao.kawaguchi@yale.edu)) & Yasuko Iwakiri ([yasuko.iwakiri@yale.edu](mailto:yasuko.iwakiri@yale.edu))  
Department of Internal Medicine  
Section of Digestive Diseases  
Yale School of Medicine  
New Haven, CT 06520  
Phone: 203-785-6204

## 2.0 Please confirm for randomised controlled trials all versions of the clinical protocol are included in the submission. These will be published online as supplementary information.

N/A
